# Supplementary material for: Epigenome-wide association study on diffusing capacity of the lung
Source: PubMed Central journal article supplement — ERJ Open Res. 2021 Mar 15;7(1):00567-2020. doi: 10.1183/23120541.00567-2020 (PMC7957297; doi:10.1183/23120541.00567-2020), 2021-03-15
Supplement: 00567-2020.supplement.pdf [file 00567-2020.supplement.pdf]

**Table S1 The association gene expression levels of AHRR and EXOC3 and gas exchange**

| Outcome | mRNA expression*    | $\beta$ | Model1      |             | Model2            |  |
|---------|---------------------|---------|-------------|-------------|-------------------|--|
|         |                     |         | 95% CI      | $\beta$     | 95% CI            |  |
| DLCO    | <i>AHRR</i>         | 1.96    | -1.13;5.05  | 3.36        | 0.49;6.24         |  |
|         | <b><i>EXOC3</i></b> | 4.77    | -0.53;10.07 | <b>7.06</b> | <b>2.26;11.85</b> |  |
| DLCO/VA | <i>AHRR</i>         | 0.22    | -0.26;0.70  | 0.4         | -0.70;0.87        |  |
|         | <b><i>EXOC3</i></b> | 0.76    | -0.06;1.58  | <b>1.05</b> | <b>0.28;1.82</b>  |  |

\*mRNA expression levels are used in the log scale.

Model 1: adjusted for age, sex, smoking status, white blood cell counts and batch effects.

Model2: adjusted for age, sex, smoking status, weight, height, white blood cell counts and batch effects.

Bold indicates statistically significant association.

**Table S2 Sensitivity analyses of smoking probes**

| Lead association | Probe Chr | Gene              | Conditioned for            | Discovery cohort (model2) |        |          |       |
|------------------|-----------|-------------------|----------------------------|---------------------------|--------|----------|-------|
|                  |           |                   |                            | B                         | SE     | P-value  | FDR   |
| cg05575921       | 5         | AHRR              | -                          | 0.065                     | 0.013  | 3.60e-07 | 0.047 |
|                  | 6         | -                 | cg06126421                 | 0.046                     | 0.011  | 1.72e-05 |       |
|                  | 2         | ALPG <sup>a</sup> | cg05951221                 | 0.028                     | 0.010  | 8.11e-03 |       |
|                  |           |                   | cg06126421 +<br>cg05951221 | 0.025                     | 0.0097 | 1.06e-02 |       |
| cg05951221       | 2         | ALPG <sup>a</sup> | -                          | 0.049                     | 0.0096 | 4.37e-07 | 0.047 |
|                  | 6         | -                 | cg06126421                 | 0.038                     | 0.0086 | 8.97e-06 |       |
|                  | 5         | AHRR              | cg05575921                 | 0.022                     | 0.0079 | 5.40e-03 |       |
|                  |           |                   | cg06126421 +<br>cg05575921 | 0.022                     | 0.0078 | 5.28e-03 |       |

<sup>a</sup>Closest gene

**Table S3 Sensitivity analysis in non-smokers**

| Lead association | Study sample             | Discovery cohort (model2) |        |          |       |
|------------------|--------------------------|---------------------------|--------|----------|-------|
|                  |                          | B                         | SE     | P-value  | FDR   |
| cg05575921       | Total population (N=659) | 0.065                     | 0.013  | 3.60e-07 | 0.047 |
|                  | In non-smokers (N=207)   | 0.023                     | 0.011  | 3.65e-02 |       |
| cg05951221       | Total population (N=659) | 0.049                     | 0.0096 | 4.37e-07 | 0.047 |
|                  | In non-smokers (N=207)   | 0.037                     | 0.015  | 1.6e-02  |       |

**Table S4 Sensitivity analysis with additional adjustment for FEV<sub>1</sub>/FVC**

| Lead association | Probe Chr | Gene              | Conditioned for       | Discovery cohort (model2) |        |          |       |
|------------------|-----------|-------------------|-----------------------|---------------------------|--------|----------|-------|
|                  |           |                   |                       | B                         | SE     | P-value  | FDR   |
| cg05575921       | 5         | AHRR              | -                     | 0.065                     | 0.013  | 3.60e-07 | 0.047 |
|                  |           |                   | FEV <sub>1</sub> /FVC | 0.047                     | 0.013  | 2.61e-04 |       |
| cg05951221       | 2         | ALPG <sup>a</sup> | -                     | 0.049                     | 0.0096 | 4.37e-07 | 0.047 |
|                  |           |                   | FEV <sub>1</sub> /FVC | 0.039                     | 0.0098 | 7.82e-05 |       |

<sup>a</sup>Closest gene
